# Supplementary material for: Calcium-sensing receptor regulates stomatal closure through hydrogen peroxide and nitric oxide in response to extracellular calcium in Arabidopsis
Source: PubMed Central journal article supplement — J Exp Bot. 2011 Sep 21;63(1):177–90. doi: 10.1093/jxb/err259 (PMC3245458; doi:10.1093/jxb/err259), 2011-09-21
Supplement: supp_err259_00062992_file001.pdf [file supp_err259_00062992_file001.pdf]

**Calcium sensing receptor regulates stomatal closure through hydrogen peroxide and nitric oxide in response to extracellular calcium in Arabidopsis**

*Wen-Hua Wang, Xiao-Qian Yi, Ai-Dong Han, Ting-Wu Liu, Juan Chen, Fei-Hua Wu, Xue-Jun Dong, Jun-Xian He, Zhen-Ming Pei, and Hai-Lei Zheng*

Supplementary Figures S1-S7

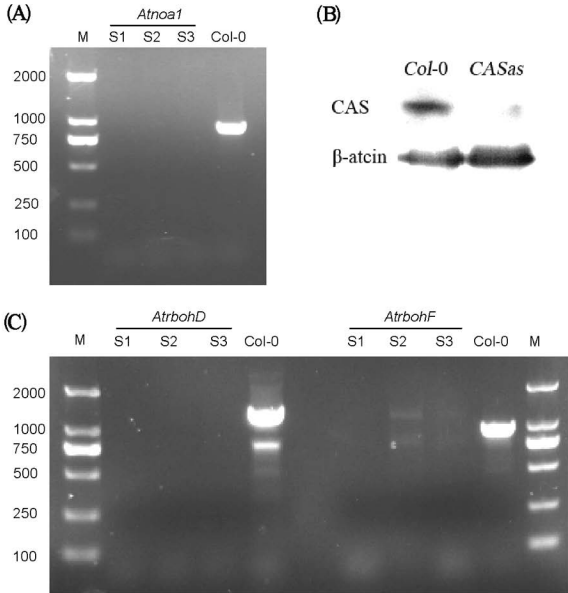

**Fig. S1.** Verifying the mutants using PCR and western blot. (A) Three independent samples of *Atnoa1* (S1 to S3) were confirmed by PCR analysis. (B) *CASas* was identified by western blot analysis using anti-CAS antibody. (C) Three independent samples of *AtrbohD/F* (S1 to S3) were confirmed by PCR analysis. The wild type (Col-0) was used as the control.

Light micrograph

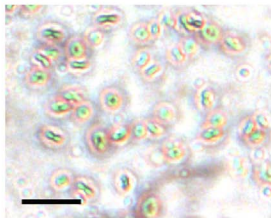

H<sub>2</sub>DCF fluorescence

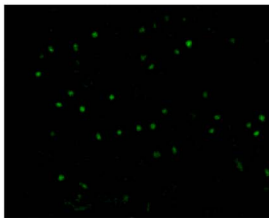

**Fig. S2.** Integrity of isolated chloroplasts was estimated by H<sub>2</sub>DCF fluorescent dye. Isolated chloroplasts were incubated in HMS buffer containing 50  $\mu$ M H<sub>2</sub>DCFDA for 1 h at 4 °C in the dark, then rinsed twice by centrifugation at 2500 g for 4 min each in HMS buffer. Fluorescence from chloroplasts was observed by fluorescence microscope. Fluorescence dots were observed from over 85% of isolated chloroplasts. Bar=10  $\mu$ m.

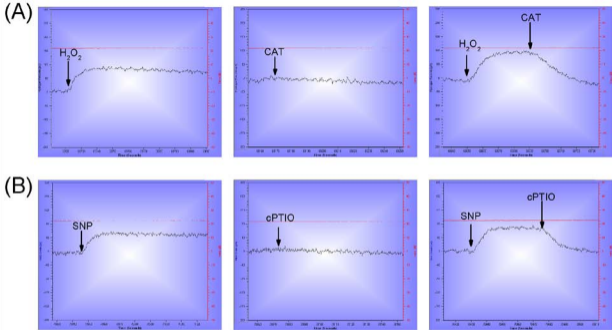

**Fig. S3.** The effects of CAT or cPTIO on H<sub>2</sub>O<sub>2</sub> or NO current detected by H<sub>2</sub>O<sub>2</sub> or NO selective electrochemical sensor. (A) Effects of CAT on H<sub>2</sub>O<sub>2</sub> current detected by ISO-HPO sensor. 4  $\mu\text{M}$  H<sub>2</sub>O<sub>2</sub> or 100 units mL<sup>-1</sup> CAT was added at the time point indicated by arrows. (B) Effects of cPTIO on NO current detected by ISO-NOP sensor. 1  $\mu\text{M}$  SNP or 100  $\mu\text{M}$  cPTIO was added at the time point indicated by arrows.

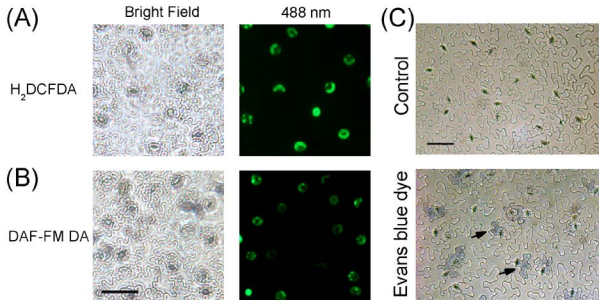

**Fig. S4** Localization of H<sub>2</sub>O<sub>2</sub> and NO on Arabidopsis epidermal peels in response to Ca<sup>2+</sup>.

(A) H<sub>2</sub>O<sub>2</sub>-induced fluorescence was observed mainly in guard cells on epidermal peels exposed to 2 mM CaCl<sub>2</sub> in MES buffer for 20 min. (B) NO-induced fluorescence was observed mainly in guard cells on epidermal peels exposed to 2 mM CaCl<sub>2</sub> in MES buffer for 20 min. Bar = 100 μm. (C) Dead epidermal cells stained with Evans blue (shown by arrows) were indicated on the epidermal peels. Bar = 100 μm.

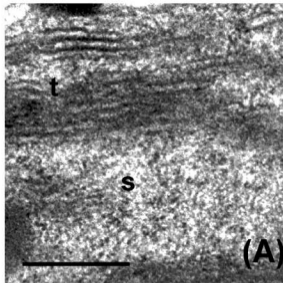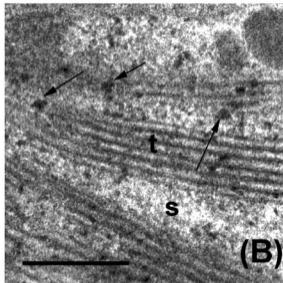

**Fig. S5.** ABA-induced  $\text{H}_2\text{O}_2$  accumulation in Arabidopsis guard cell chloroplasts from the wild type with  $\text{CeCl}_3$ -staining by the TEM. (A) Guard cell from leaf section incubated in MES buffer (control) showed no  $\text{H}_2\text{O}_2$  staining in chloroplast. (B) 10  $\mu\text{M}$  ABA-induced  $\text{H}_2\text{O}_2$  accumulation can be seen as black precipitate spots in chloroplast. The black spots in the transmission electron microscope images represent  $\text{H}_2\text{O}_2$  forming electron dense cerium perhydroxide precipitates. Examples of individual precipitates are shown by arrows. s, stroma; t, thylakoids. Bar = 200 nm.

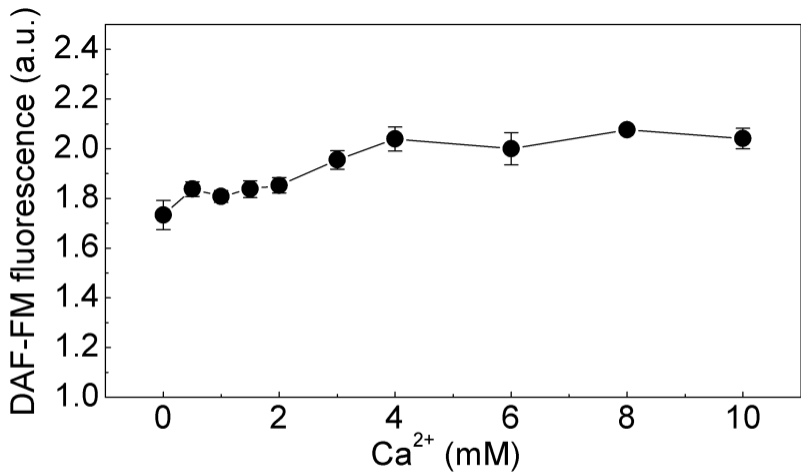

**Fig. S6.** Effect of Ca<sup>2+</sup> on NO generation in isolated Arabidopsis chloroplasts. Averaged increases in relative DAF-FM fluorescence in chloroplasts plotted as a function of applied CaCl<sub>2</sub> for 10 min (n=8, ±SE).

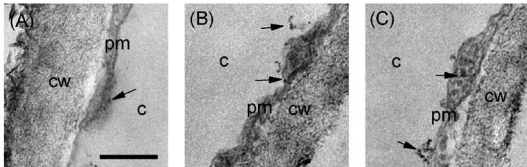

**Fig. S7** TEM images of plasma membrane and cytoplasm in *Arabidopsis* guard cell with  $\text{CeCl}_3$ -staining in response to  $\text{Ca}^{2+}$ . (A) TEM images showing the plasma membrane and cytoplasm of the wild type guard cell with  $\text{CeCl}_3$ -staining without  $\text{CaCl}_2$  treatment. (B, C) TEM images of plasma membrane and cytoplasm in guard cell with  $\text{CeCl}_3$ -staining from the wild type (B) or *CAS4s* (C) leaves incubated in 2 mM  $\text{CaCl}_2$ . The black spots in the TEM images represent  $\text{H}_2\text{O}_2$  forming electron dense cerium perhydroxide precipitates. Examples of individual precipitates are shown by arrows. c, cytoplasm; cw, cell wall; pm plasma membrane. Bar = 200 nm.
